# Supplementary material for: Colorless Polyimides Derived from 5,5′-bis(2,3-norbornanedicarboxylic anhydride): Strategies to Reduce the Linear Coefficients of Thermal Expansion and Improve the Film Toughness
Source: MDPI journal article supplement (doi:10.3390/polym15183838), 2023-09-20
Supplement: s1 [file s1]

## Supplementary Materials

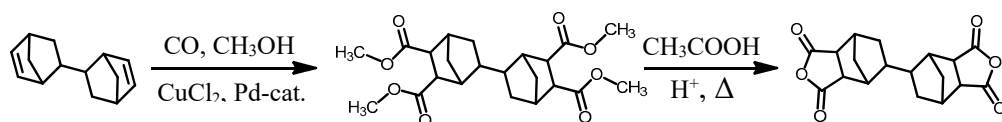

**Figure S1.** Reaction scheme for the synthesis of BNBDA.

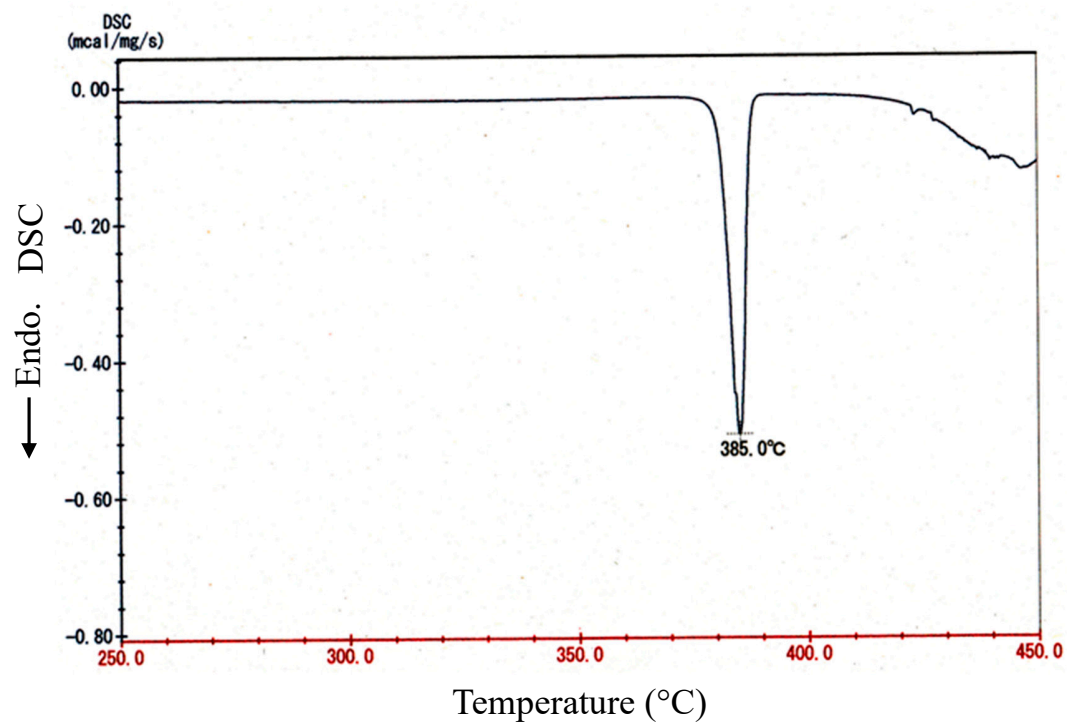

**Figure S2.** DSC thermogram of sublimated BNBDA.

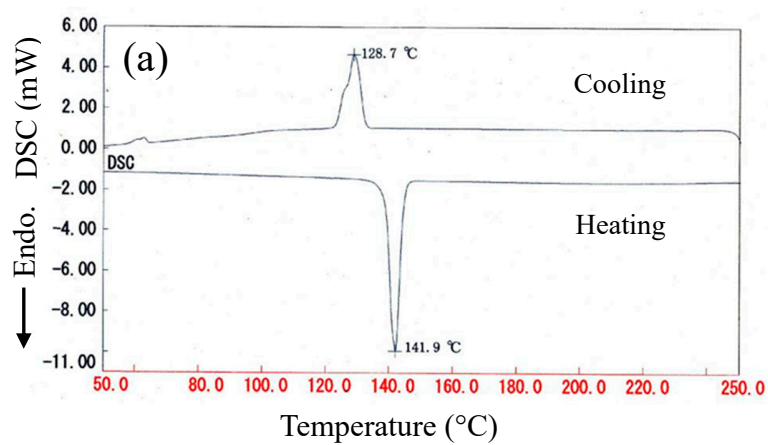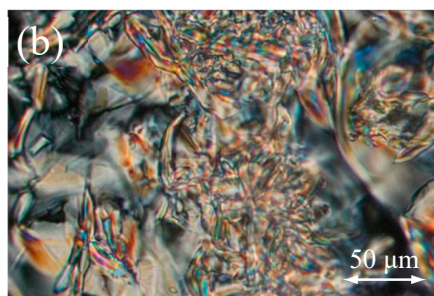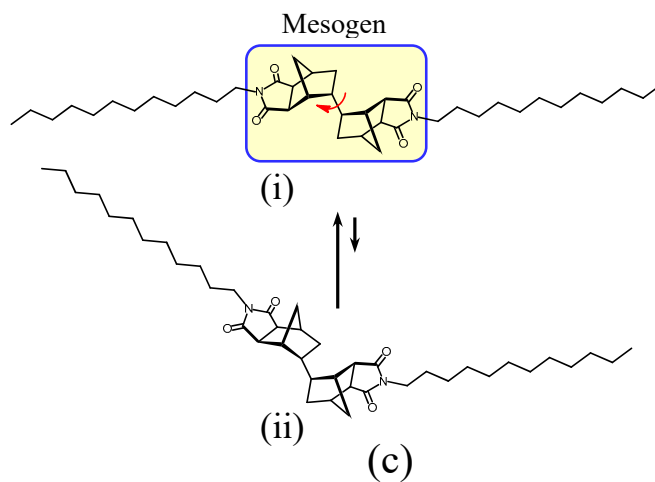

**Figure S3.** Thermal behavior of C<sub>12</sub>-model: (a) DSC thermograms in the heating and cooling processes, (b) polarizing optical microscope photograph taken at 135.8 °C during the cooling process from 160 °C above the clearing point (139.6 °C), and (c) expected conformations favorable (i) and unfavorable (ii) for liquid-crystal formation.

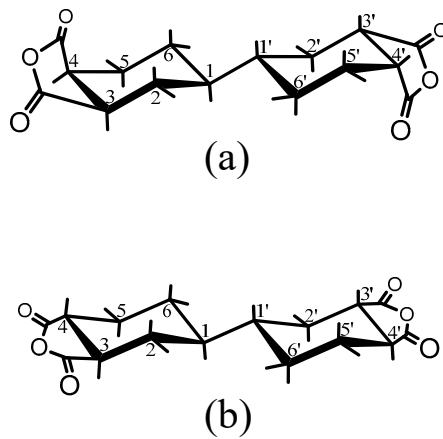

**Figure S4.** Steric structures of stereoisomers isolated by Shiotani et al. [33,64]: (a) *rel*-(1R,1'S,3R,3'S,4S,4'R)-dicyclohexyl-3,3',4,4'-tetracarboxylic dianhydride (*cis*-DCDA) and (b) *rel*-(1R,1'S,3R,3'S,4R,4'S)-dicyclohexyl-3,3',4,4'-tetracarboxylic dianhydride (*trans*-DCDA).

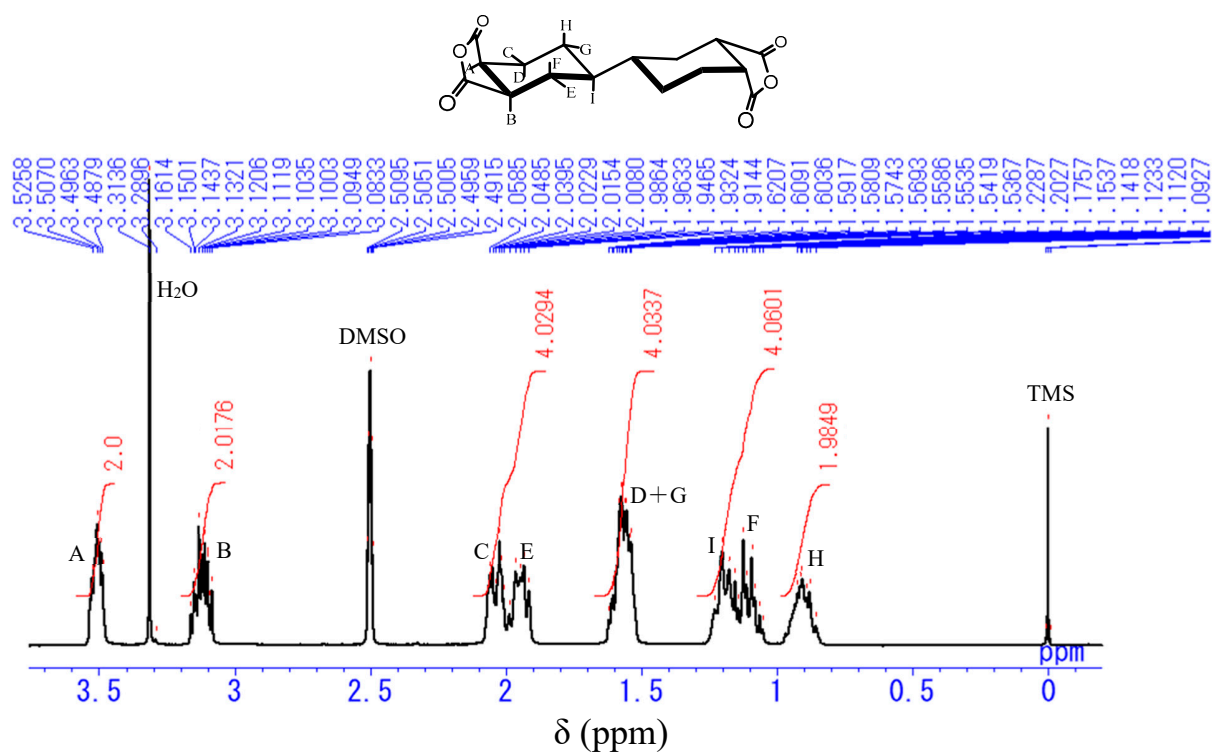

**Figure S5.** <sup>1</sup>H-NMR spectrum (DMSO-*d*<sub>6</sub>) of H-BPDA used in this study.

**Table S1.** Results of solubility tests using powder samples obtained via modified one-pot process for BNBDA-based PIs and related systems. The appearance of a typical PI powder sample used is shown at the bottom of the table.

| No. | TCDA<br>(mol%)          | Diamine<br>(mol%)          | $\eta_{\text{red}}$ (PI)<br>(dL g <sup>-1</sup> ) | $C^a$<br>(wt%) | NMP                                         | DMAc | DMF | DMSO | <i>m</i> -cresol | CPN | GBL | DOX | THF | CF | ACT | EtAc |
|-----|-------------------------|----------------------------|---------------------------------------------------|----------------|---------------------------------------------|------|-----|------|------------------|-----|-----|-----|-----|----|-----|------|
|     |                         |                            |                                                   |                | Heating temperature (°C) at the second step |      |     |      |                  |     |     |     |     |    |     |      |
|     |                         |                            |                                                   |                | 150                                         | 150  | 140 | 150  | 150              | 130 | 150 | 100 | 60  | 50 | 50  | 70   |
| 12R | BNBDA (70)<br>6FDA (30) | TFMB                       | 1.06                                              | 22.5           | ++                                          | ++   | ++  | +    | +                | ++  | +   | ±   | +   | ++ | +   | —    |
| 13R | BNBDA (60)<br>6FDA (40) | TFMB                       | 1.34                                              | 16.1           | ++                                          | ++   | ++  | +    | +                | +   | +   | ±   | +   | +  | ±   | —    |
| 19R | BNBDA (70)<br>6FDA (30) | TFMB (80)<br>4,4'-ODA (20) | 1.24                                              | 21.7           | +                                           | ++   | ++  | +    | +                | ++  | +   | +   | +   | ++ | —   | —    |
| 20R | BNBDA (70)<br>6FDA (30) | TFMB (80)<br>3,4'-ODA (20) | 1.65                                              | 17.9           | +                                           | +    | ++  | +    | +                | ++  | +   | ±   | +   | +  | —   | —    |
| 22R | BNBDA                   | TFMB (80)<br>BAPP (20)     | 5.05                                              | 5.5            | ++                                          | ++   | ++  | +    | +                | +   | +   | —   | ±   | ++ | —   | —    |
| 23R | ibid                    | TFMB (70)<br>BAPP (30)     | 3.18                                              | 7.5            | ++                                          | ++   | ++  | +    | +                | ++  | ++  | +   | +   | ++ | —   | —    |
| 24R | ibid                    | TFMB (60)<br>BAPP (40)     | 3.30                                              | 8.2            | ++                                          | ++   | ++  | +    | +                | ++  | ++  | +   | +   | ++ | —   | —    |
| 25R | ibid                    | TFMB (50)<br>BAPP (50)     | 3.84                                              | 7.9            | ++                                          | ++   | ++  | +    | +                | ++  | ++  | +   | +   | ++ | —   | —    |
| 26R | H-BPDA                  | TFMB (70)<br>BAPP (30)     | 0.86                                              | 17.5           | ++                                          | ++   | ++  | ++   | ++               | ++  | ++  | ++  | ++  | ++ | ±   | ±    |

(++) Soluble at room temperature, (+) soluble when heated at established temperatures, (±) deformed or swelled, and (—) insoluble even by heating.

DMF = *N,N*-dimethylformamide, CPN = cyclopentanone, DOX = 1,4-dioxane, THF = tetrahydrofuran, CF = chloroform, ACT = acetone, and EtAc = ethyl acetate.

<sup>a</sup> Solid content in GBL solutions used for solution casting.

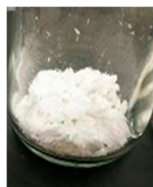

#23R
